# Supplementary material for: Glucosan controlled biomineralization of SrCO3 complex nanostructures with superhydrophobicity and adsorption properties
Source: Royal Society of Chemistry journal article supplement (doi:10.1039/c0jm04535g), 2011-01-01
Supplement: c0jm04535g.pdf [file c0jm04535g.pdf]

## Supplementary Information for

# Glucosan controlled biomineralization of $\text{SrCO}_3$ complex nanostructures with superhydrophobicity and adsorption properties

Shuisheng Wu,<sup>a,b</sup> Shuangfeng Yin,<sup>\*a</sup> Huaqiang Cao,<sup>\*b</sup> Yuexiang Lu,<sup>b</sup> Jiefu Yin<sup>b</sup> and Baojun Li<sup>b</sup>

<sup>a</sup> College of Chemistry and Chemical Engineering, Hunan University, Changsha 410082, Hunan P. R. China.

E-mail: sfyin73@yahoo.com.cn

<sup>b</sup> Department of Chemistry, Tsinghua University, Beijing 100084, P R China.

E-mail: hqcao@mail.tsinghua.edu.cn

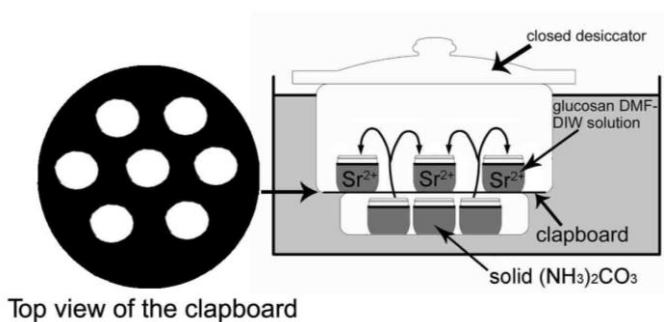

**Scheme S1.** Illustration of the  $\text{SrCO}_3$  synthesis process

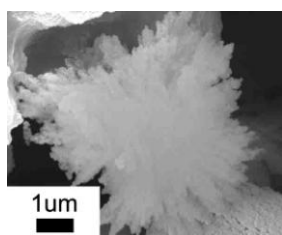

**Figure S1.** higher magnification of SEM images of *SCO-8*

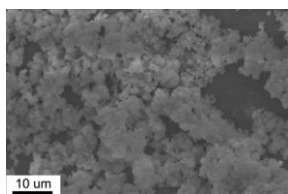

**Figure S2.** SEM images of commercial  $\text{SrCO}_3$

**Movie. S1** The movie of the sliding angle measurement of as-synthesized *SCO-8* nanostructures.
